# Supplementary material for: Population surveillance of cardiovascular diseases in low-income to middle-income countries should leverage existing international collaborations
Source: PubMed Central journal article supplement — BMJ Glob Health. 2018 Oct 1;3(5):e000866. doi: 10.1136/bmjgh-2018-000866 (PMC6169659; doi:10.1136/bmjgh-2018-000866), 2018-10-01
Supplement: bmjgh-2018-000866supp001.pdf [file bmjgh-2018-000866supp001.pdf]

**Supplementary Table 1.** Items of the World Health Organization (WHO) STEPwise approach to non-communicable diseases surveillance surveys

| <b>NCD</b>    | <b>Risk factors (the future)</b>                                                                                                             | <b>Diseases (the present)</b>                                                                       | <b>Death (the past)</b>                                                           |
|---------------|----------------------------------------------------------------------------------------------------------------------------------------------|-----------------------------------------------------------------------------------------------------|-----------------------------------------------------------------------------------|
| <b>Step 1</b> | Questionnaire-based report on key behavioural risk factors such as tobacco use, alcohol consumption, dietary pattern and physical inactivity | Hospital or clinic admissions by sociodemographic factors                                           | Death rates by sociodemographic factors                                           |
| <b>Step 2</b> | Questionnaire plus objective physical measurements such as excess body fat, high blood pressure                                              | Rates and principal condition by sociodemographic factors and principal conditions, NCDs and injury | Death rates by sociodemographic factors and broad cause of death (verbal autopsy) |
| <b>Step 3</b> | Questionnaire plus objective physical measurements plus biochemical measurements such as , blood glucose and blood lipids                    | Sociodemographic factors and cause-specific disease incidence or prevalence                         | Death rates by sociodemographic factors and cause of death (death certificate)    |
