# Supplementary material for: Population surveillance of cardiovascular diseases in low-income to middle-income countries should leverage existing international collaborations
Source: PubMed Central journal article supplement — BMJ Glob Health. 2018 Oct 1;3(5):e000866. doi: 10.1136/bmjgh-2018-000866 (PMC6169659; doi:10.1136/bmjgh-2018-000866), 2018-10-01
Supplement: bmjgh-2018-000866supp002.pdf [file bmjgh-2018-000866supp002.pdf]

**Supplementary Table 2.** STEPwise Approach to surveillance (STEPS) stroke surveys core items

|                                                               | <b>Core items</b>                                                                                                                       | <b>Expanded items</b>                                                                                         | <b>Provides data on</b>                             |
|---------------------------------------------------------------|-----------------------------------------------------------------------------------------------------------------------------------------|---------------------------------------------------------------------------------------------------------------|-----------------------------------------------------|
| <b>Step 1</b><br>Hospitalized events<br>(fatal and non-fatal) | <ul style="list-style-type: none"> <li>➤ Demographic information</li> <li>➤ Time of onset</li> <li>➤ Vital status day 10</li> </ul>     | <ul style="list-style-type: none"> <li>• Treatment</li> <li>• Disability</li> <li>• Type of stroke</li> </ul> | <i>Stroke admissions and hospital case fatality</i> |
| <b>Step 2</b><br><b>Fatal events in the community</b>         | <ul style="list-style-type: none"> <li>➤ Demographic information</li> <li>➤ Death certificates, or</li> <li>➤ Verbal autopsy</li> </ul> | <ul style="list-style-type: none"> <li>• Autopsy/necropsy reports</li> <li>• Type of stroke</li> </ul>        | <i>Stroke deaths</i>                                |
| <b>Step 3</b><br><b>Non-fatal events in the community</b>     | <ul style="list-style-type: none"> <li>➤ Demographic information</li> <li>➤ Time of onset</li> <li>➤ Vital status day 10</li> </ul>     | <ul style="list-style-type: none"> <li>• Treatment</li> <li>• Disability</li> <li>• Type of stroke</li> </ul> | <i>Stroke incidence and case fatality</i>           |
